# Supplementary material for: Swarm Intelligence in Animal Groups: When Can a Collective Out-Perform an Expert?
Source: PLoS One. 2010 Nov 24;5(11):e15505. doi: 10.1371/journal.pone.0015505 (PMC2991365; doi:10.1371/journal.pone.0015505)
Supplement: File S1 — Output of Model 1. (XLS). [file pone.0015505.s001.xls]

## Sheet: sigma = 0.1
1	2	3	4	5	6	7	8	9	10	11	12	13	14	15
0	0	0.149943	0	0.0991043	0	0.0656563	0	0.0446671	0	0.0307035	0	0.0217674	0	0.0149822
0	0	0.395702	0	0.463759	0	0.506054	0	0.533453	0	0.555843	0	0.576012	0	0.590491
Row 1 = Size of group
Row 2 = Expert choice rule
Row 3 = Aggregated choice rule
Entries in cells = Accuracy of decision

## Sheet: sigma = 0.3
1	2	3	4	5	6	7	8	9	10	11	12	13	14	15
0	0	0.287218	0	0.244464	0	0.207295	0	0.180311	0	0.155158	0	0.138731	0	0.123166
0	0	0.535063	0	0.609814	0	0.652449	0	0.685514	0	0.70417	0	0.728244	0	0.739819
Row 1 = Size of group
Row 2 = Expert choice rule
Row 3 = Aggregated choice rule
Entries in cells = Accuracy of decision

## Sheet: sigma = 0.5
1	2	3	4	5	6	7	8	9	10	11	12	13	14	15
0	0	0.499346	0	0.498777	0	0.49787	0	0.497168	0	0.501059	0	0.498956	0	0.50078
0	0	0.688979	0	0.757271	0	0.798635	0	0.823172	0	0.843565	0	0.857755	0	0.871232
Row 1 = Size of group
Row 2 = Expert choice rule
Row 3 = Aggregated choice rule
Entries in cells = Accuracy of decision

## Sheet: sigma = 0.7
1	2	3	4	5	6	7	8	9	10	11	12	13	14	15
0	0	0.710152	0	0.756262	0	0.791883	0	0.817821	0	0.840323	0	0.860428	0	0.876908
0	0	0.81561	0	0.868774	0	0.897401	0	0.913836	0	0.926118	0	0.935895	0	0.942202
Row 1 = Size of group
Row 2 = Expert choice rule
Row 3 = Aggregated choice rule
Entries in cells = Accuracy of decision

## Sheet: sigma = 0.9
1	2	3	4	5	6	7	8	9	10	11	12	13	14	15
0	0	0.850265	0	0.902728	0	0.935039	0	0.955507	0	0.968455	0	0.978725	0	0.985084
0	0	0.891227	0	0.9278	0	0.945575	0	0.956839	0	0.963476	0	0.969242	0	0.972755
Row 1 = Size of group
Row 2 = Expert choice rule
Row 3 = Aggregated choice rule
Entries in cells = Accuracy of decision
